# Supplementary material for: Tumor Suppressor Properties of Small C-Terminal Domain Phosphatases in Clear Cell Renal Cell Carcinoma
Source: MDPI journal article supplement (doi:10.3390/ijms241612986), 2023-08-19
Supplement: s1 [file s1]

# Supplementary Materials

**Supplementary Table S1–S5**

**Table S1.** Differential expression of SCP members in ccRCC (TCGA data, KIRC dataset).

(A)

| <i>Pooled samples</i> |        |                     |                      |                |               |                      |                     |
|-----------------------|--------|---------------------|----------------------|----------------|---------------|----------------------|---------------------|
|                       | Log2FC | FDR                 | <i>P</i> -value      | avg. tumor CPM | avg. norm CPM | rel. LogCPM [normal] | pseudo Log2FC [T/N] |
| <i>CTDSP1</i>         | 0.3    | $3 \times 10^{-8}$  | $1.2 \times 10^{-8}$ | 211.9          | 172.7         |                      |                     |
| <i>CTDSP2</i>         | -0.2   | $7 \times 10^{-5}$  | $6 \times 10^{-5}$   | 264.7          | 298.2         |                      |                     |
| <i>CTDSPL</i>         | -1.4   | $4 \times 10^{-34}$ | $7 \times 10^{-35}$  | 61.2           | 157.8         |                      |                     |
| <i>RB1</i>            | 0.3    | $9 \times 10^{-8}$  | $6 \times 10^{-8}$   | 108.0          | 85.5          |                      |                     |

(B)

| <i>Paired samples</i> |               |                     |                     |                |               |                |
|-----------------------|---------------|---------------------|---------------------|----------------|---------------|----------------|
|                       | Log2FC (mean) | FDR                 | <i>P</i> -value     | avg. tumor CPM | avg. norm CPM | Log2FC profile |
| <i>CTDSP1</i>         | 0.2           | 0.0001              | $8 \times 10^{-5}$  | 204.5          | 172.7         |                |
| <i>CTDSP2</i>         | -0.1          | 0.29                | 0.29                | 286.1          | 298.2         |                |
| <i>CTDSPL</i>         | -1.4          | $2 \times 10^{-10}$ | $4 \times 10^{-11}$ | 63.1           | 157.8         |                |
| <i>RB1</i>            | 0.5           | $8 \times 10^{-9}$  | $3 \times 10^{-9}$  | 124.0          | 85.5          |                |

Upper plot (A) demonstrates the comparison of two pools of samples (tumors versus normal tissues); lower plot (B) – each tumor was compared to the adjacent normal tissue. Log2FC – binary logarithm of fold change; CPM – read counts per million. Mini-plots in right cells (A) show the relative binary logarithm of CPM values normalized to the average value across all normal samples, or Log2FC for paired samples (B). Red/blue – the expression is above/below the average value for normal samples (pooled test, A) or up-/down-regulated for a current patient (paired samples, B). The vertical axis scale is from -4 to +4 (from 16-fold down-regulation to 16-fold up-regulation).

**Table S2.** Co-expression of SCP family phosphatases and their target RB1 in clear cell renal carcinoma (TCGA data).

|                  | <i>CTDSP1</i>        | <i>RB1</i>           | <i>CTDSP2</i>       | <i>CTDSPL</i> |               |
|------------------|----------------------|----------------------|---------------------|---------------|---------------|
| <i>CTDSP1</i>    |                      | -0.07                | -0.15               | -0.21         | corr. coeff.  |
| <i>RB1</i>       | 0.08                 |                      | 0.21                | 0.00          |               |
| <i>CTDSP2</i>    | $3 \times 10^{-4}$   | $1.3 \times 10^{-7}$ |                     | 0.46          |               |
| <i>CTDSPL</i>    | $1.4 \times 10^{-7}$ | 0.9                  | $2 \times 10^{-33}$ |               |               |
| <i>p</i> -values |                      |                      |                     |               |               |
|                  |                      |                      |                     |               | avg. LogFC    |
|                  |                      |                      |                     |               | 0.3           |
|                  |                      |                      |                     |               | 0.3           |
|                  |                      |                      |                     |               | -0.2          |
|                  |                      |                      |                     |               | -1.4          |
|                  |                      |                      |                     |               | LogFC profile |
|                  |                      |                      |                     |               |               |
|                  |                      |                      |                     |               |               |
|                  |                      |                      |                     |               |               |
|                  |                      |                      |                     |               |               |

Spearman's rank correlation coefficient  $r_s$  is shown in the upper part of correlation matrix, *p*-values – in the lower part.

**Table S3.** Methylation profiling of *CTDSPL* (A) and *CTDSP2* (B) genes in ccRCC (TCGA data, KIRC dataset, 320 tumors and 160 normal samples).

(A)

*CTDSPL*

| Chromating state (ENCODE) |          |         |          |       |         | Beta-value median |            | delta beta-value (Tumor minus Normal),<br>paired samples | correlations with RNA-Seq |       |                   |                   |                     |       |            |
|---------------------------|----------|---------|----------|-------|---------|-------------------|------------|----------------------------------------------------------|---------------------------|-------|-------------------|-------------------|---------------------|-------|------------|
| H1-hESC                   | K562     | GM12878 | HepG2    | HUVEC | HeLa-S3 | position (chr3)   | CpG ID     |                                                          | T                         | N     | HM score [pooled] | HM score [paired] | r [pooled]          | p     | r [paired] |
| TSS                       | TSS      | T       | TSS      | E     | TSS     | 37 902 230        | cg00056624 | 0.02                                                     | 0.02                      | 3.9   | 0.2               | -0.08             | 0.137               | -0.01 | 0.952      |
| TSS                       |          | R       | TSS      | E     | E       | 37 902 414        | cg27201297 | 0.03                                                     | 0.03                      | 3.7   | 0.3               | -0.10             | 0.053               | 0.17  | 0.416      |
| E                         |          | R       | TSS      | E     | E       | 37 902 565        | cg03637781 | 0.04                                                     | 0.03                      | 5.8   | 0.5               | -0.26             | 7×10 <sup>-7</sup>  | -0.15 | 0.472      |
| E                         |          | R       | TSS      | E     | E       | 37 902 571        | cg02843755 | 0.05                                                     | 0.04                      | 5.3   | 0.3               | -0.20             | 0.0002              | -0.29 | 0.162      |
| TSS                       |          | R       | TSS      |       | E       | 37 902 742        | cg12824246 | 0.09                                                     | 0.07                      | 16.8  | 2.0               | -0.23             | 1×10 <sup>-5</sup>  | 0.46  | 0.023      |
|                           | E        |         | TSS      | E     |         | 37 903 683        | cg11239633 | 0.07                                                     | 0.07                      | 4.5   | 0.1               | -0.09             | 0.1063              | -0.17 | 0.418      |
|                           | E        |         | TSS      | E     |         | 37 903 685        | cg11171719 | 0.05                                                     | 0.05                      | 2.4   | 0.0               | -0.09             | 0.1049              | -0.10 | 0.645      |
| TSS                       | TSS      | R       | TSS      | E     | E       | 37 904 035        | cg01439112 | 0.18                                                     | 0.16                      | 15.6  | 1.8               | -0.44             | 7×10 <sup>-18</sup> | -0.29 | 0.175      |
| TSS                       | E        | R       | TSS      | E     | E       | 37 904 294        | cg12919119 | 0.36                                                     | 0.26                      | 37.7  | 8.0               | -0.57             | 4×10 <sup>-31</sup> | -0.56 | 0.004      |
| TSS                       | E        | R       | TSS      | E     | E       | 37 904 476        | cg08229360 | 0.21                                                     | 0.16                      | 25.2  | 3.8               | -0.49             | 8×10 <sup>-22</sup> | -0.50 | 0.014      |
|                           | CTCTCTCT |         | CTCTCTCT |       |         | 37 906 587        | cg12386061 | 0.13                                                     | 0.26                      | 0.0   | 0.0               | -0.01             | 0.8394              | -0.51 | 0.011      |
| R                         | R        | R       | T        | T     | R       | 37 920 131        | cg22380476 | 0.90                                                     | 0.89                      | 15.7  | 2.6               | 0.23              | 1×10 <sup>-5</sup>  | 0.13  | 0.542      |
| R                         |          | R       | T        | T     | T       | 37 926 308        | cg13430960 | 0.92                                                     | 0.80                      | 130.9 | 360.4             | -0.48             | 1×10 <sup>-20</sup> | -0.15 | 0.481      |
| R                         |          | R       | E        | T     | R       | 37 944 839        | cg13333722 | 0.94                                                     | 0.67                      | 204.5 | 934.8             | -0.64             | 1×10 <sup>-41</sup> | -0.33 | 0.118      |
| R                         | R        | R       | T        | R     | R       | 37 959 357        | cg08545213 | 0.93                                                     | 0.84                      | 121.7 | 280.2             | -0.40             | 7×10 <sup>-15</sup> | 0.25  | 0.241      |
| R                         | R        | R       |          | R     | R       | 37 965 819        | cg05990080 | 0.76                                                     | 0.73                      | 42.2  | 16.1              | -0.28             | 1×10 <sup>-7</sup>  | -0.23 | 0.279      |
|                           | R        | R       |          | R     | T       | 37 966 888        | cg12605080 | 0.83                                                     | 0.72                      | 83.8  | 75.5              | -0.44             | 8×10 <sup>-18</sup> | -0.27 | 0.199      |
| R                         | R        | R       | TSS      | E     |         | 37 977 734        | cg02355558 | 0.53                                                     | 0.57                      | 2.3   | 0.0               | -0.19             | 0.0003              | -0.44 | 0.03       |
| WE                        | R        | R       | T        | E     | E       | 37 987 839        | cg12902896 | 0.24                                                     | 0.21                      | 27.3  | 7.4               | -0.31             | 4×10 <sup>-9</sup>  | -0.39 | 0.06       |
| WE                        | R        | R       | T        | WE    | R       | 38 003 248        | cg01534527 | 0.46                                                     | 0.36                      | 55.8  | 62.3              | -0.42             | 1×10 <sup>-15</sup> | -0.41 | 0.047      |
| R                         | R        | R       | T        |       | R       | 38 009 912        | cg26160492 | 0.95                                                     | 0.97                      | 0.0   | 0.0               | -0.13             | 0.0136              | 0.04  | 0.845      |
| R                         | R        | R       | T        |       | R       | 38 009 935        | cg04787317 | 0.90                                                     | 0.79                      | 112.5 | 276.1             | -0.56             | 2×10 <sup>-29</sup> | -0.20 | 0.353      |
| T                         | R        | R       | T        |       | R       | 38 010 392        | cg08171483 | 0.76                                                     | 0.63                      | 82.6  | 102.2             | -0.40             | 2×10 <sup>-14</sup> | -0.20 | 0.349      |
| R                         | R        | R       | T        |       | T       | 38 010 716        | cg26054057 | 0.61                                                     | 0.49                      | 59.0  | 29.5              | -0.45             | 2×10 <sup>-18</sup> | -0.32 | 0.123      |
| T                         |          | R       | T        | T     | T       | 38 010 839        | cg07816047 | 0.43                                                     | 0.44                      | 16.4  | 0.8               | -0.28             | 1×10 <sup>-7</sup>  | -0.35 | 0.093      |
| T                         |          | R       | T        | T     | T       | 38 010 903        | cg15555217 | 0.71                                                     | 0.79                      | 0.0   | 0.0               | -0.15             | 0.0092              | -0.13 | 0.635      |

**(B)**  
**CTDSP2**

| Chromatin state (ENCODE) |      |         |       |       |         | Beta-value median   |            |      |      | correlations with RNA-Seq                                |                      |                      |            |                     |            |       |
|--------------------------|------|---------|-------|-------|---------|---------------------|------------|------|------|----------------------------------------------------------|----------------------|----------------------|------------|---------------------|------------|-------|
| H1-hESC                  | K562 | GM12878 | HepG2 | HUVEC | HeLa-S3 | position<br>(chr12) | CpG ID     | T    | N    | delta beta-value (Tumor minus Normal),<br>paired samples | HM score<br>[pooled] | HM score<br>[paired] | r [pooled] | p                   | r [paired] | p     |
| T                        | T    | T       | T     |       | T       | 58 217 367          | cg07246187 | 0.83 | 0.84 |                                                          | 0.0                  | 0.0                  | -0.05      | 0.3577              | -0.29      | 0.174 |
| T                        | T    | T       | T     | T     | T       | 58 218 060          | cg04118006 | 0.93 | 0.93 |                                                          | 2.9                  | 4.3                  | 0.00       | 0.9346              | -0.42      | 0.041 |
| T                        | T    | T       | T     | T     | T       | 58 218 603          | cg07617764 | 0.85 | 0.83 |                                                          | 29.8                 | 7.6                  | -0.04      | 0.4517              | -0.02      | 0.912 |
| T                        | T    | T       | T     | T     | T       | 58 218 621          | cg01190168 | 0.85 | 0.84 |                                                          | 0.2                  | 0.0                  | -0.04      | 0.4681              | -0.18      | 0.413 |
| T                        | T    | T       | T     | T     | T       | 58 218 673          | cg15851964 | 0.92 | 0.92 |                                                          | 0.0                  | 3.4                  | 0.03       | 0.5838              | 0.01       | 0.968 |
| T                        | T    | T       | T     | T     | T       | 58 219 113          | cg17169243 | 0.77 | 0.77 |                                                          | 0.0                  | 0.2                  | 0.09       | 0.0889              | 0.09       | 0.683 |
| T                        | T    | T       | T     | T     | T       | 58 219 818          | cg09263904 | 0.68 | 0.64 |                                                          | 43.9                 | 23.7                 | -0.22      | 5*10 <sup>-5</sup>  | -0.36      | 0.082 |
| T                        | T    | T       | T     | T     | T       | 58 224 503          | cg21149967 | 0.87 | 0.85 |                                                          | 30.9                 | 12.5                 | -0.14      | 0.0091              | 0.01       | 0.979 |
| T                        | T    | TSS     | T     | E     | T       | 58 232 985          | cg02566627 | 0.49 | 0.36 |                                                          | 44.4                 | 22.5                 | -0.18      | 0.0009              | -0.17      | 0.432 |
| TSS                      | T    | TSS     |       |       | T       | 58 236 349          | cg03228931 | 0.91 | 0.82 |                                                          | 102.8                | 206.8                | -0.24      | 1*10 <sup>-5</sup>  | -0.26      | 0.226 |
| TSS                      | T    | TSS     |       |       | T       | 58 236 713          | cg01644731 | 0.72 | 0.58 |                                                          | 66.9                 | 71.2                 | -0.25      | 4*10 <sup>-6</sup>  | -0.19      | 0.379 |
|                          | T    | TSS     | PF    |       | T       | 58 237 273          | cg16915316 | 0.36 | 0.30 |                                                          | 26.3                 | 14.4                 | -0.25      | 3*10 <sup>-6</sup>  | -0.41      | 0.044 |
| WE                       | T    | TSS     |       |       | WE      | 58 237 707          | cg04415672 | 0.45 | 0.20 |                                                          | 133.6                | 676.5                | -0.33      | 3*10 <sup>-10</sup> | -0.27      | 0.21  |
| TSS                      |      | TSS     |       |       |         | 58 238 233          | cg09183316 | 0.11 | 0.04 |                                                          | 76.3                 | 21.8                 | -0.32      | 1*10 <sup>-9</sup>  | -0.51      | 0.01  |
| TSS                      | TSS  | TSS     | TSS   | TSS   | TSS     | 58 239 135          | cg03091738 | 0.03 | 0.02 |                                                          | 1.7                  | 0.0                  | 0.00       | 0.9762              | -0.06      | 0.793 |
| TSS                      | TSS  | TSS     | TSS   | TSS   | TSS     | 58 239 325          | cg05902531 | 0.01 | 0.01 |                                                          | 0.8                  | 0.0                  | 0.04       | 0.4433              | 0.02       | 0.944 |
| TSS                      | TSS  | TSS     | TSS   | TSS   | TSS     | 58 239 493          | cg26639561 | 0.04 | 0.04 |                                                          | 2.4                  | 0.0                  | 0.02       | 0.6587              | -0.20      | 0.361 |
| TSS                      | TSS  | TSS     | TSS   | TSS   | TSS     | 58 239 513          | cg02540427 | 0.04 | 0.04 |                                                          | 2.1                  | 0.0                  | 0.12       | 0.0214              | -0.08      | 0.705 |
| TSS                      | TSS  | TSS     | TSS   | TSS   | TSS     | 58 239 953          | cg13667676 | 0.01 | 0.01 |                                                          | 1.4                  | 0.0                  | 0.02       | 0.6549              | -0.29      | 0.168 |
| TSS                      | TSS  | TSS     | TSS   | TSS   | TSS     | 58 240 177          | cg11762629 | 0.03 | 0.03 |                                                          | 2.6                  | 0.0                  | -0.04      | 0.4439              | -0.17      | 0.42  |
| TSS                      | TSS  | TSS     | TSS   | TSS   | TSS     | 58 240 443          | cg12592194 | 0.03 | 0.03 |                                                          | 2.5                  | 0.0                  | 0.03       | 0.6143              | 0.01       | 0.946 |
| TSS                      | TSS  | TSS     | TSS   | TSS   | TSS     | 58 240 788          | cg20499859 | 0.02 | 0.02 |                                                          | 1.2                  | 0.0                  | -0.08      | 0.1643              | -0.15      | 0.475 |
| TSS                      | TSS  | TSS     | TSS   | TSS   | TSS     | 58 240 810          | cg19593762 | 0.02 | 0.01 |                                                          | 2.4                  | 0.1                  | -0.10      | 0.0729              | -0.23      | 0.274 |
| TSS                      | TSS  | TSS     | TSS   | TSS   | TSS     | 58 240 818          | cg26645635 | 0.01 | 0.01 |                                                          | 1.5                  | 0.0                  | -0.05      | 0.3226              | -0.17      | 0.423 |
| TSS                      | TSS  | TSS     | TSS   | TSS   | TSS     | 58 240 844          | cg05342250 | 0.03 | 0.03 |                                                          | 2.0                  | 0.0                  | 0.10       | 0.0702              | -0.11      | 0.6   |
| TSS                      | TSS  | TSS     | TSS   | TSS   | TSS     | 58 240 897          | cg16444117 | 0.01 | 0.01 |                                                          | 1.4                  | 0.0                  | -0.11      | 0.0401              | -0.20      | 0.347 |
| TSS                      | TSS  | TSS     | TSS   | TSS   | TSS     | 58 241 040          | cg00677455 | 0.03 | 0.03 |                                                          | 2.6                  | 0.1                  | -0.01      | 0.838               | 0.09       | 0.677 |
| TSS                      | TSS  | TSS     |       |       |         | 58 241 201          | cg02732509 | 0.21 | 0.22 |                                                          | 0.0                  | 0.0                  | 0.02       | 0.7694              | 0.24       | 0.25  |
| TSS                      | TSS  | TSS     |       |       |         | 58 241 216          | cg23105471 | 0.06 | 0.06 |                                                          | 0.0                  | 0.0                  | -0.09      | 0.0935              | 0.35       | 0.093 |

Mini-plots “delta beta-value (Tumor minus Normal), paired samples” show difference of beta-values (beta value is a ratio of methylated DNA in the sample at current position), between a tumor and adjacent normal tissue. Vertical axis scale is from -1 to +1. Red – hypermethylation, blue – hypo-methylation. HM score – hypermethylation score based either on comparison of beta-value distribution across two pools (tumors and norms) or on the pairwise comparison for matched tumors and normal tissues. Predicted chromatin states: E – enhancer, WE – weak enhancer, TSS – promoter region, PF – promoter flanking regions, CTCF – insulator element, R – repressed region, T – transcribed region.

**Table S4.** Top predicted microRNA regulators of genes *CTDSP1/2/L* and *RB1*.

|    | <i>RB1</i>       | <i>CTDSP1</i>    | <i>CTDSP2</i>    | <i>CTDSPL</i>    |
|----|------------------|------------------|------------------|------------------|
| 1  | mir-106a -0.21   | mir-183 -0.46    | mir-15a -0.31    | mir-18a -0.51    |
| 2  | mir-26a-2 -0.24  | mir-182 -0.41    | mir-34a -0.19    | mir-181b-1 -0.43 |
| 3  | mir-335 -0.24    | mir-501 -0.28    | mir-16-1 -0.23   | mir-16-2 -0.53   |
| 4  | mir-221 -0.27    | mir-500a -0.31   | mir-15b -0.20    | mir-181a-1 -0.33 |
| 5  | mir-26b -0.10    | mir-324 -0.11    | mir-150 -0.21    | mir-15a -0.55    |
| 6  | mir-675 -0.12    | mir-362 -0.27    | mir-423 -0.17    | mir-181b-2 -0.32 |
| 7  | mir-199a-2 -0.22 | mir-149 -0.20    | mir-195 -0.08    | mir-15b -0.51    |
| 8  | mir-199b -0.23   | mir-654 -0.12    | mir-182 -0.05    | mir-100 -0.10    |
| 9  | mir-199a-1 -0.22 | mir-214 -0.11    | mir-330 -0.15    | mir-34a -0.38    |
| 10 | mir-26a-1 -0.05  | mir-891a -0.38   | mir-130b -0.28   | mir-122 -0.51    |
| 11 | let-7g -0.09     | mir-500b -0.16   | mir-497 -0.01    | mir-155 -0.70    |
| 12 | mir-127 -0.24    | mir-125b-1 -0.14 | mir-1270-2 -0.28 | mir-17 -0.41     |
| 13 | mir-20b -0.11    | mir-200c -0.35   | mir-1270-1 -0.28 | mir-181d -0.14   |
| 14 | let-7e -0.07     | mir-874 -0.35    | mir-590 -0.25    | mir-142 -0.53    |
| 15 | mir-149 -0.26    | mir-660 -0.26    | mir-221 -0.10    | mir-21 -0.68     |
| 16 | mir-29a -0.33    | mir-22 -0.17     | mir-185 -0.22    | mir-25 -0.52     |
| 17 | mir-30b -0.46    | mir-141 -0.32    | mir-424 -0.03    | mir-93 -0.56     |
| 18 | mir-98 -0.04     | mir-29b-2 -0.32  | mir-196b -0.05   | mir-106b -0.62   |
| 19 | let-7d -0.05     | mir-532 -0.24    | mir-625 -0.22    | mir-195 -0.14    |
| 20 | mir-218-2 -0.32  | mir-20b -0.30    | mir-3613 -0.31   | mir-885 -0.28    |

Top-20 potential regulating microRNA for *RB1* and *CTDSP1/2/L*. The values in each cell represent Spearman's correlation coefficient between the gene and the microRNA expression level. This is also represented with cell color. The bars inside cells indicate prediction score of microRNA binding site according to several databases (from left to right): miRTarBase (strong experimental evidence), TargetScan (conservative binding sites, CS), PicTar (CS), DIANA microT, mirSVR (CS), TargetScan (non-CS), PicTar (non-CS), miRTarBase (weak experimental evidence), mirSVR (non-CS). Cell borders indicate miRNA-gene pairs with predicted binding site (dashed border – only non-CS sites; double border – several reliable algorithms). MicroRNAs are sorted by overall prediction score (decreasing).

**Table S5.** Clinical characteristics of patients with ccRCC.

|        |                                      |
|--------|--------------------------------------|
| Age    | Average 53<br>Range 32–80            |
| Gender | Men 48% (25/52)<br>Women 52% (27/52) |

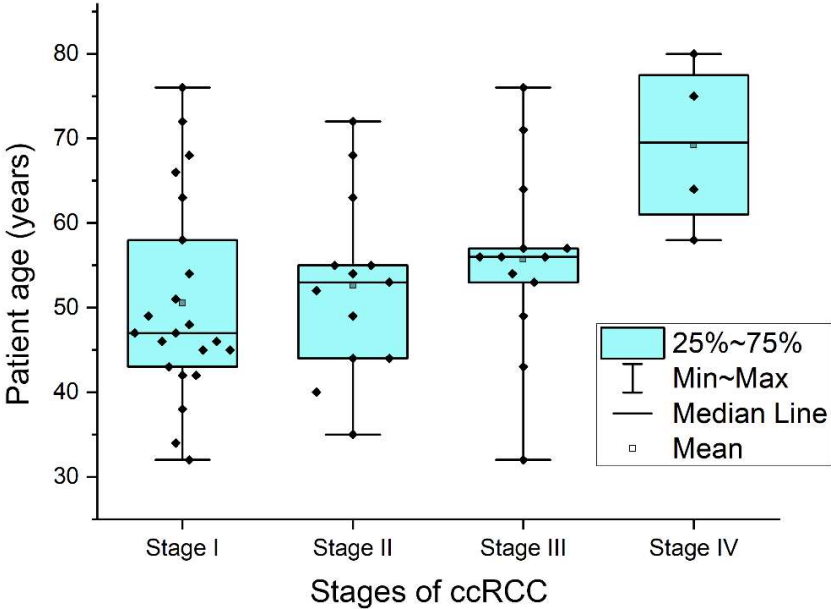

In total there were: 22 ccRCC stage I samples, 13 stage II samples, 17 stage III samples and 4 stage IV samples, which due to low statistical significance were not used in the calculations.

Supplementary Figure S1–S3

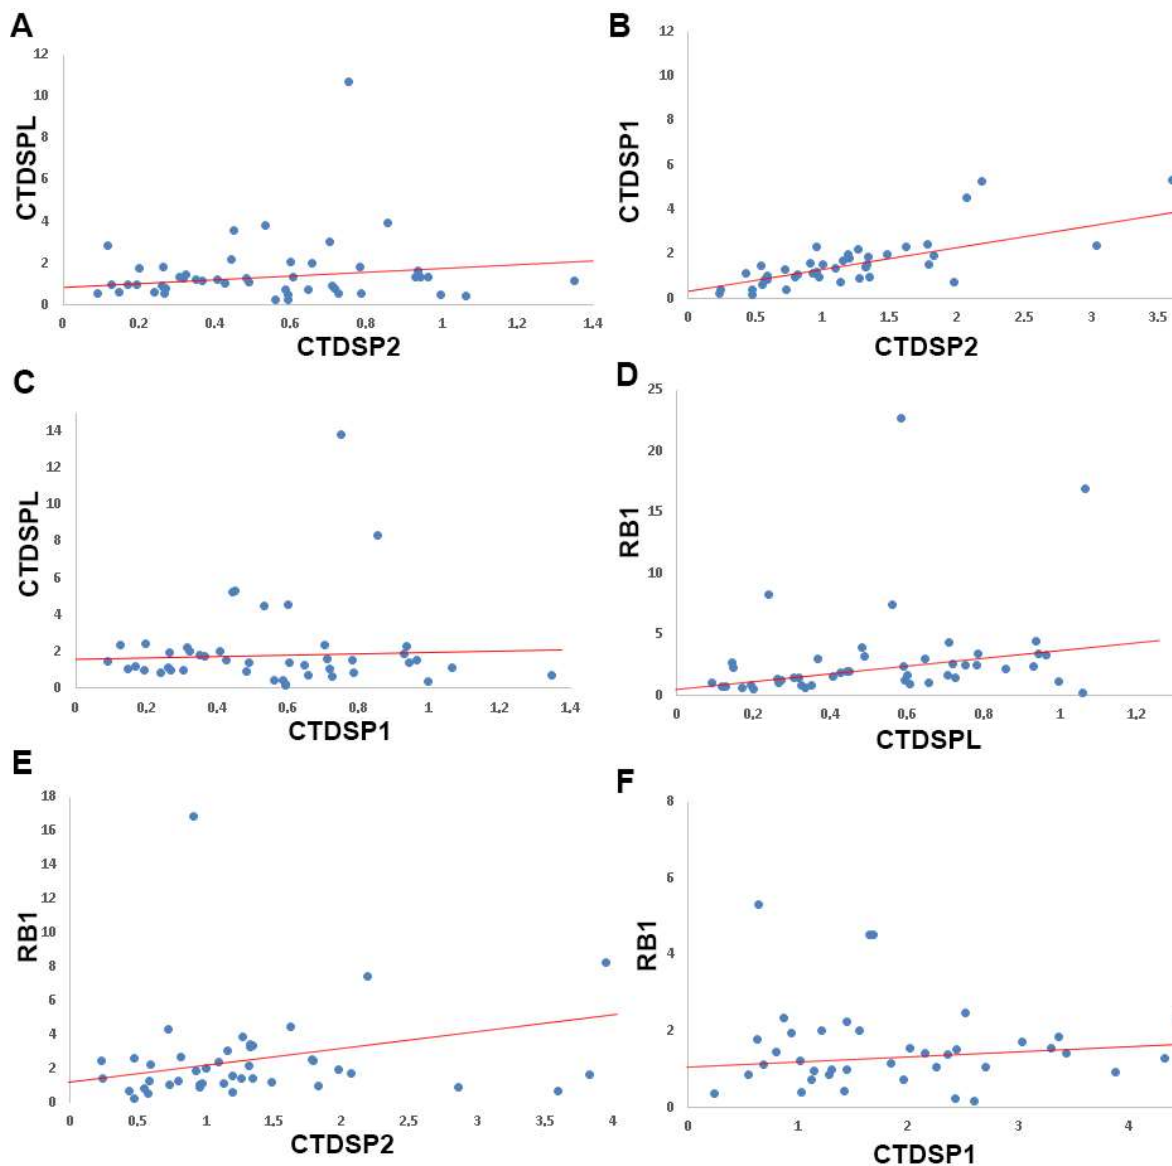

**Figure S1.** Results of the correlation analysis of the expression of the *CTDSP1*, *CTDSP2*, *CTDSPL* and *RB1* genes. The axes show the values of the relative expression levels. The correlation of expression for genes *CTDSPL* and *CTDSP2* (A), *CTDSP1* and *CTDSP2* (B), *CTDSPL* and *CTDSP1* (C), *RB1* and *CTDSP1* (D), *RB1* and *CTDSP2* (E), *RB1* and *CTDSP1* (F) is presented. Statistically significant co-expression was revealed only for two pairs: *CTDSP1* and *CTDSP2* ( $r_s = 0.76$ ;  $P < 0.001$ ) (B); *CTDSPL* and *RB1* ( $r_s = 0.38$ ;  $P < 0.05$ ) (D). No significant differences were found in the case of male and female patients and in tumors with and without metastases ( $P > 0.05$ ).

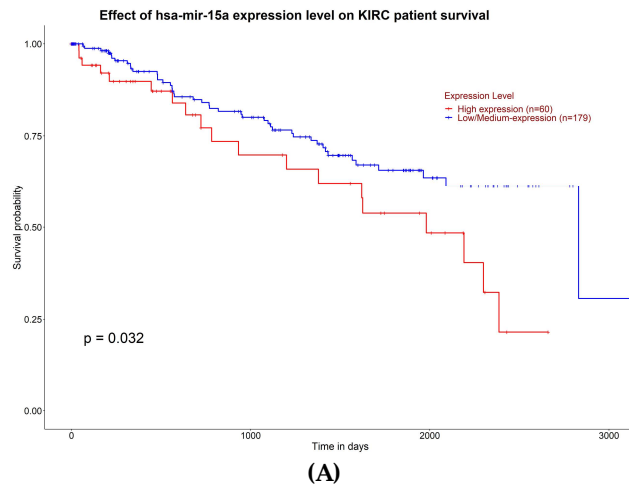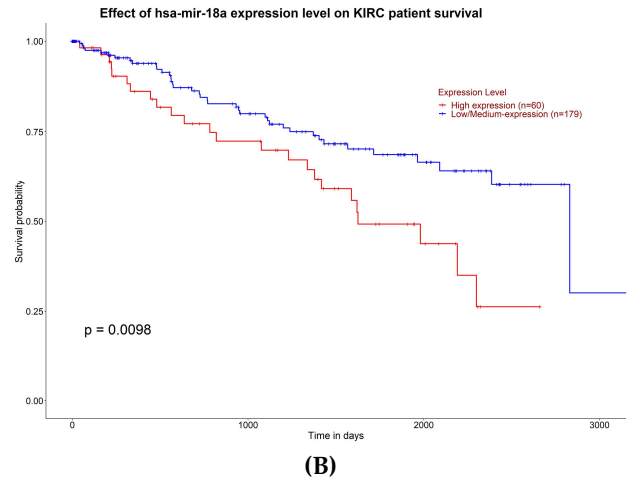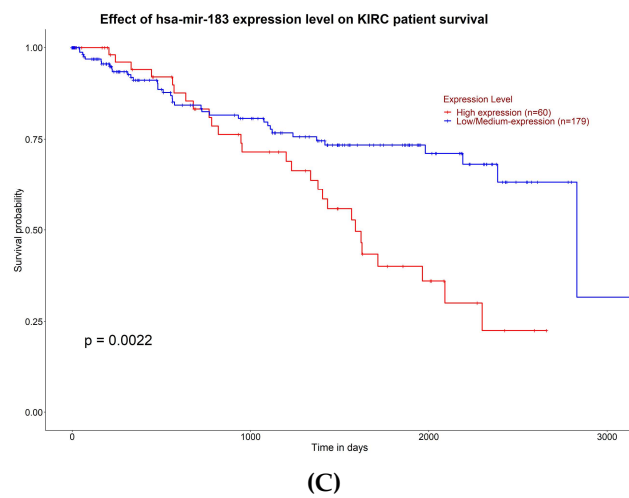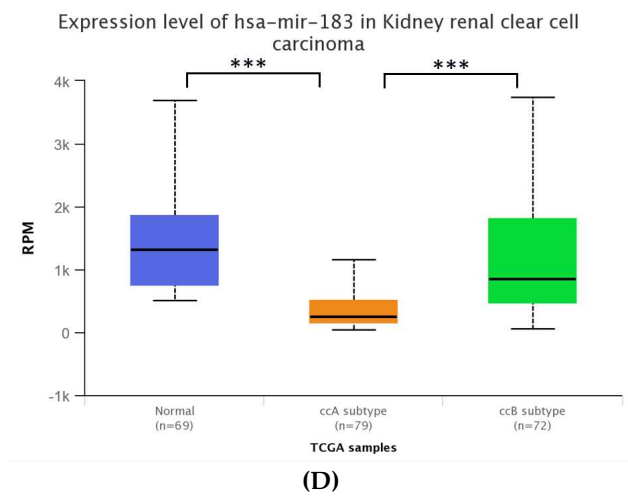

**Figure S2.** Survival analysis of microRNAs (predicted by CrossHub) using UALCAN web portal. Effect of mir-183 expression level on KIRC patient survival (A), effect of mir-15a expression level on KIRC patient survival (B), effect of mir-18a expression level on KIRC patient survival (C), expression of mir-183 in KIRC depending on ccRCC subtypes (D). \*\*\*  $p < 0.001$

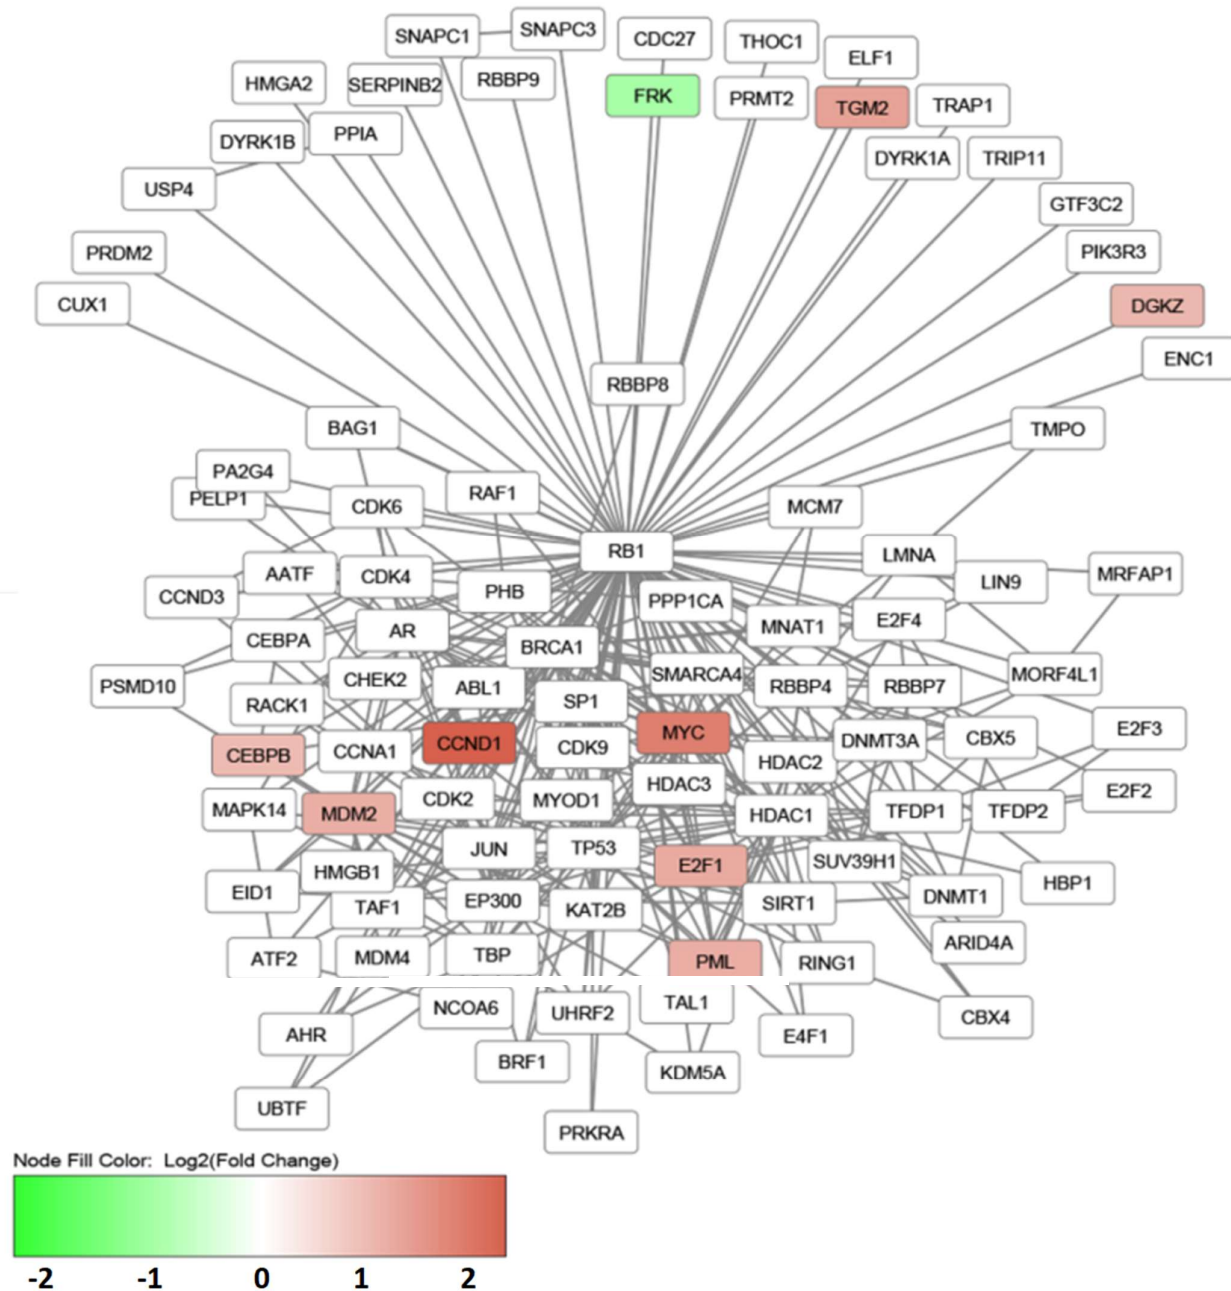

**Figure S3.** Protein-protein interactions networks (including the data from high-throughput screens) for *RB1* taking into account differentially expressed genes in ccRCC. The genes with decreased and increased expression are marked with a gradient from green to red (color scale represents log2 of expression level fold change, tumor versus normal). The network was inferred using the GPS-Prot (BioGrid data). Differentially expressed genes in ccRCC (TCGA; KIRC dataset) were derived with ANOVA algorithm using GEPIA2.
